# Supplementary material for: Circulating Tumor Cell Enumeration for Serial Monitoring of Treatment Outcomes for Locally Advanced Esophageal Squamous Cell Carcinoma
Source: MDPI journal article supplement (doi:10.3390/cancers15030832), 2023-01-29
Supplement: s1 [file s1]

## **List of Supplementary Figures and Tables**

Supplementary Figure S1: Flow chart of patient selection

Supplementary Figure S2: Timeline for serial blood specimen collection

Supplementary Figure S3: Kaplan-Meier analysis of treatment with PFS and OS

Supplementary Figure S4: Higher total CTC<sub>E+M</sub> counts at baseline, 1M, 3M, 6M and 9M post-operation, statistically significant differences were observed at baseline and 3M post-operation

Supplementary Figure S5: Summary of serial analysis of positive CTC detection rate

Supplementary Table S1: Blood sampling at different timepoints

Supplementary Table S2: ROC cut off of CTC and survival

Supplementary Table S3: Association of pre-III CTC<sub>2E</sub> with poor pre-surgery treatment response in subgroup of 9 patients with adjuvant treatment after surgery

Supplementary Table S4: The range, median and positive detection rates of epithelial CTC<sub>E</sub> at CTC1 to CTC13

Supplementary Table S5: The range, median and positive detection rates of total CTC<sub>E+M</sub> at CTC1 to CTC13

Supplementary Table S6: Patients with recurrent CTC clusters

Supplementary Table S7: Univariate COX regression analysis of clinical pathological parameters and CTC counts at baseline, pre- and post-operation with progression-free and overall survival.

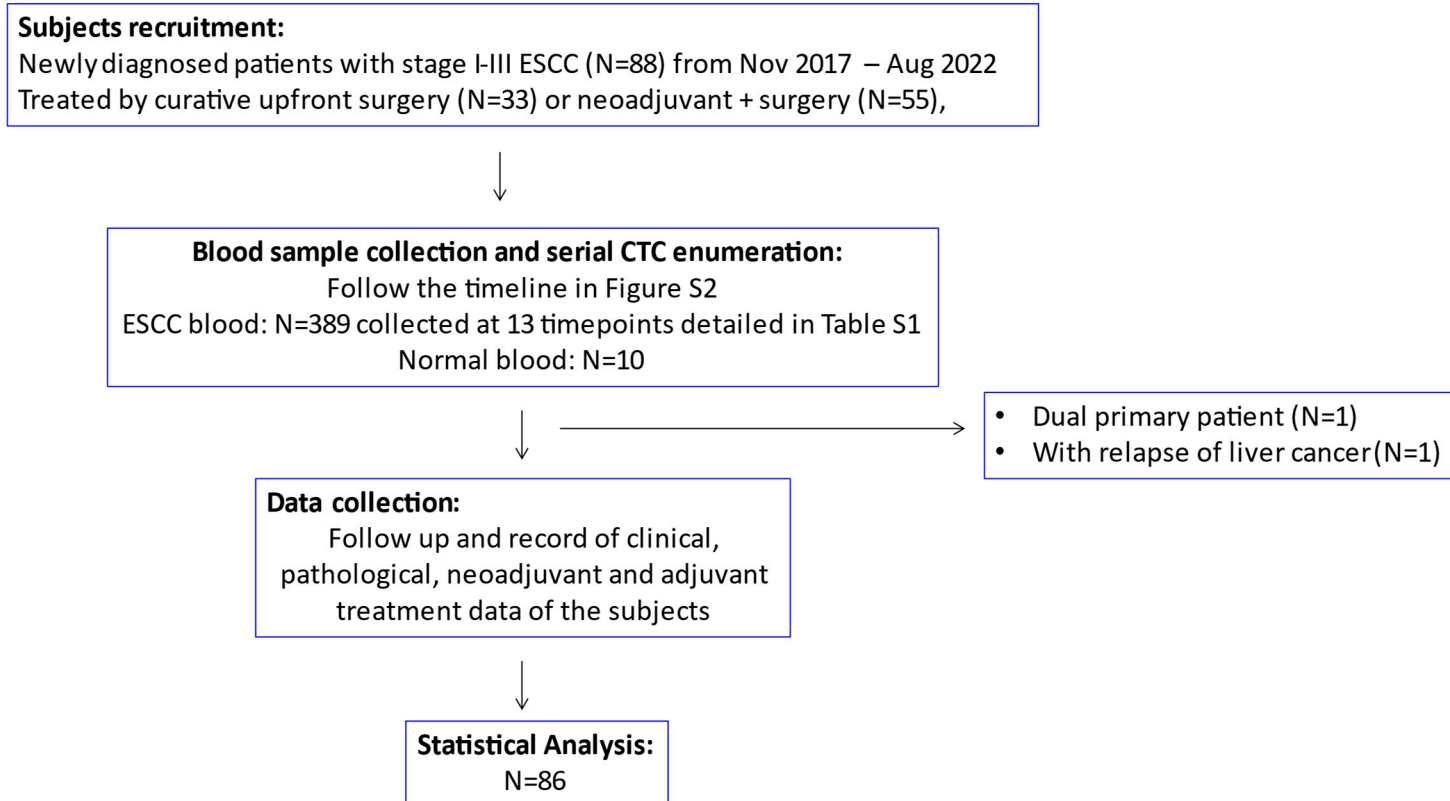

1

One patient was recruited for two lines of treatment after progression. CT treatment included paclitaxel and carboplatin (TC) or platinum-based (cisplatin and 5-fluorouracil (PF) or docetaxel (TPF)) chemotherapy.

**Figure S1: Flow chart of patient selection**

## Group 1/2: CTRT ± Surgery

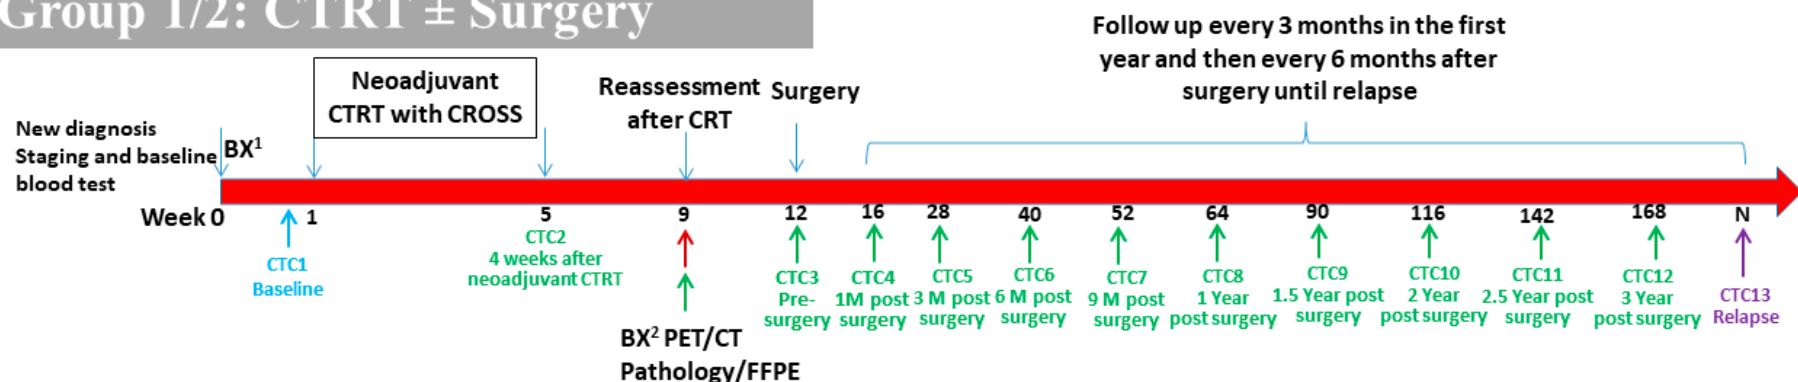

## Group 3: Surgery

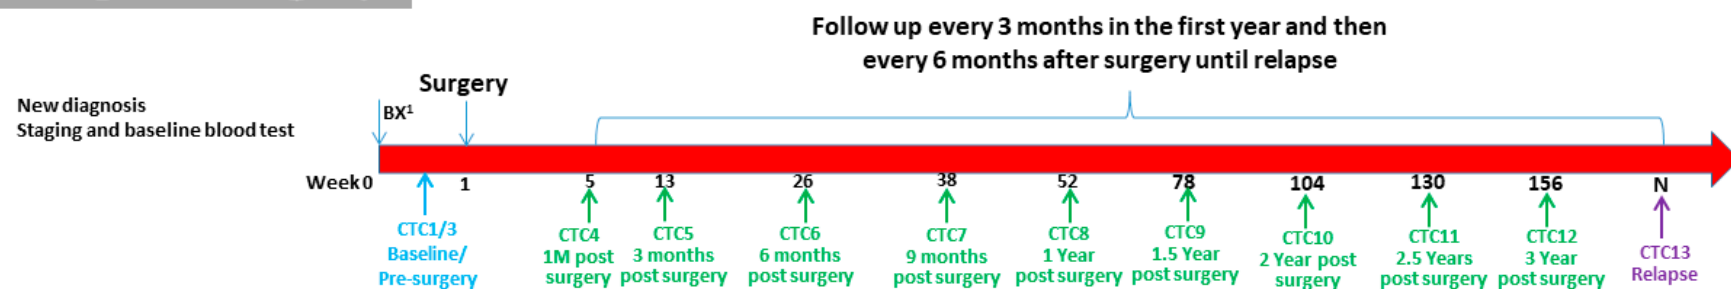

### Remarks:

CTC2: Reassessment at about 4 weeks after neoadjuvant CRT

CTC3: ~4 Weeks after surgery as early predictive biomarkers

CTC4-7: ~3/6/9/12 months post surgery for some cases, CTC8-12: ~1/1.5/2/2.5/3 years post surgery for some cases, CTC4-12 = CTCN, whichever comes earlier

CTCN: Relapse

BX1: For patients with more than three bites, one bite was collected. For patients without biopsy, the FFPE blocks were collected from pathology department if available.

1

Supplementary Figure S2: Timeline for serial blood specimen collection

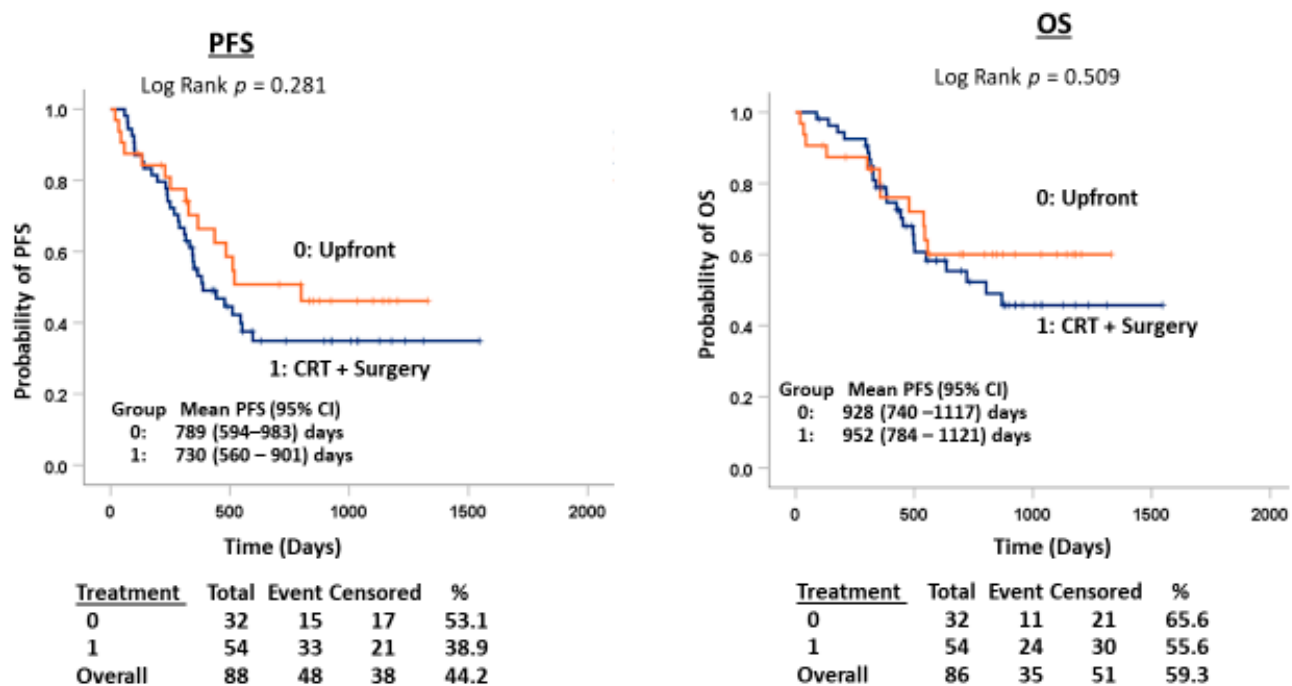

Supplementary Figure S3: Kaplan Meier analysis of treatment with PFS and OS

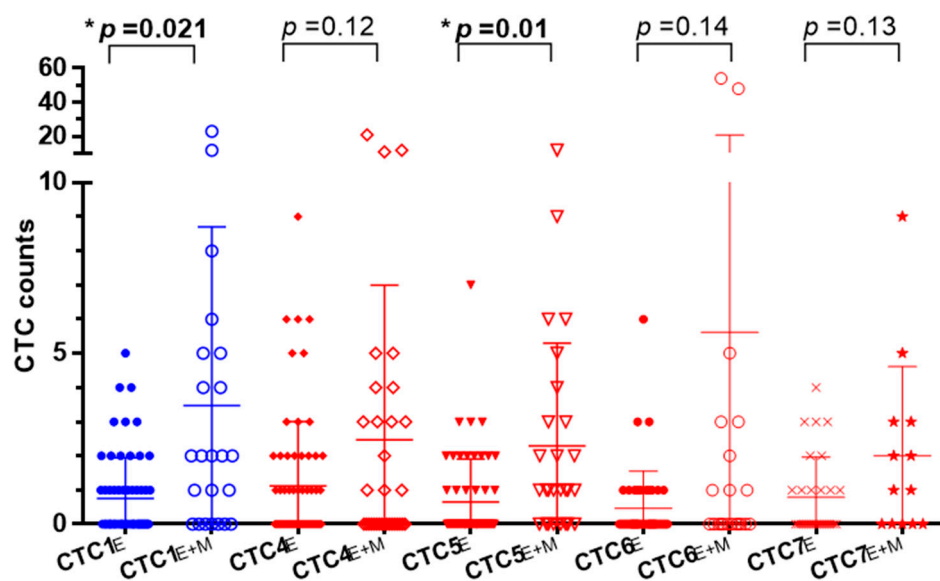

Supplementary Figure S4: Higher total CTC<sub>E+M</sub> counts at baseline, 1M, 3M, 6M and 9M post-operation, statistically significant differences were observed at baseline and 3M post-operation.

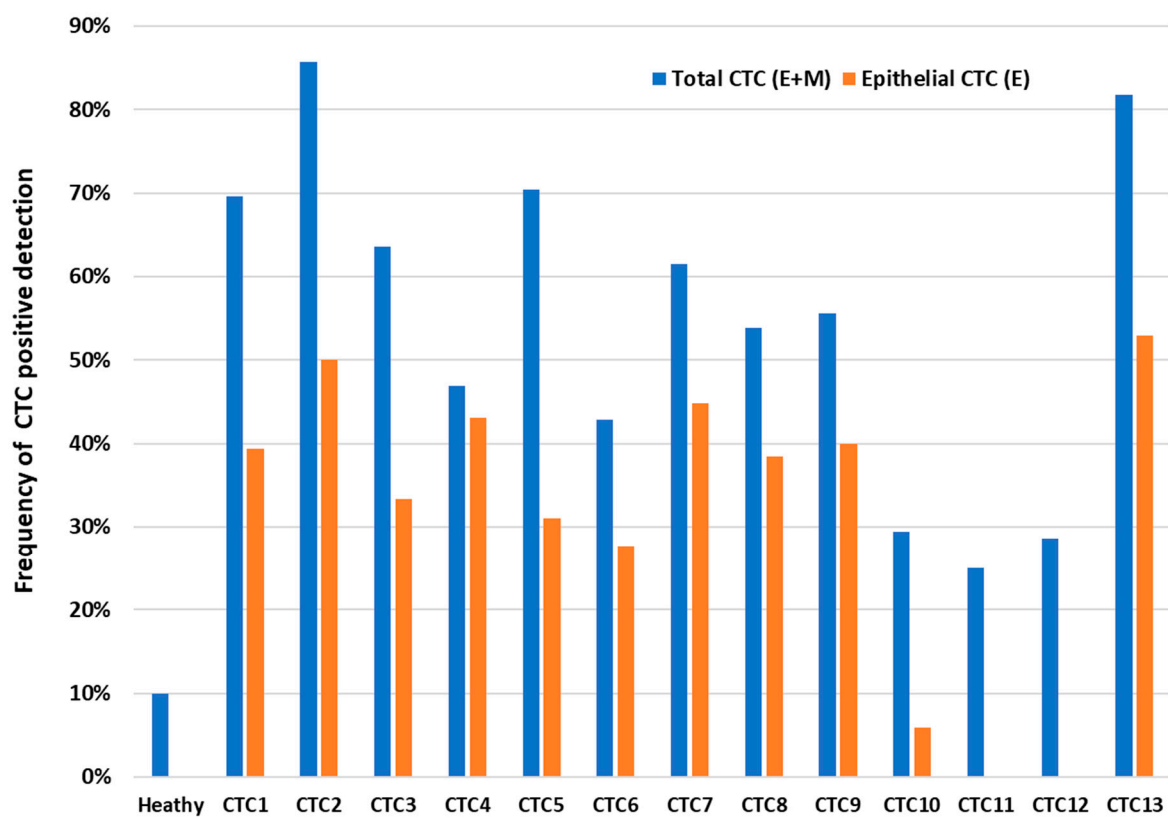

**Supplementary Figure S5: Summary of serial analysis of positive CTC detection rate**

**Supplementary Table S1: Blood sampling at different timepoints**

| <b>Timepoints</b>        | <b>CRT + surgery<br/>(N = 55)</b> | <b>Surgery<br/>(N = 33)</b> | <b>Total<br/>(N = 88)</b> |
|--------------------------|-----------------------------------|-----------------------------|---------------------------|
| <b>CTC1*</b>             | <b>32</b>                         | <b>29</b>                   | <b>61</b>                 |
| <b>CTC2</b>              | <b>10</b>                         | <b>NA</b>                   | <b>10</b>                 |
| <b>CTC3</b>              | <b>45</b>                         | <b>NA</b>                   | <b>45</b>                 |
| <b>CTC4</b>              | <b>39</b>                         | <b>26</b>                   | <b>65</b>                 |
| <b>CTC5</b>              | <b>35</b>                         | <b>23</b>                   | <b>58</b>                 |
| <b>CTC6</b>              | <b>27</b>                         | <b>20</b>                   | <b>47</b>                 |
| <b>CTC7</b>              | <b>14</b>                         | <b>15</b>                   | <b>29</b>                 |
| <b>CTC8</b>              | <b>13</b>                         | <b>13</b>                   | <b>26</b>                 |
| <b>CTC9</b>              | <b>6</b>                          | <b>4</b>                    | <b>10</b>                 |
| <b>CTC10</b>             | <b>10</b>                         | <b>7</b>                    | <b>17</b>                 |
| <b>CTC11</b>             | <b>6</b>                          | <b>6</b>                    | <b>12</b>                 |
| <b>CTC12</b>             | <b>3</b>                          | <b>4</b>                    | <b>7</b>                  |
| <b>CTC13</b>             | <b>11</b>                         | <b>6</b>                    | <b>17</b>                 |
| <b>Total<sup>a</sup></b> | <b>241</b>                        | <b>148</b>                  | <b>389</b>                |

\*27 patients missed the baseline. The baseline CTC were missing in 20 patients received neoadjuvant CRT treatment at other hospitals and then transfer to QMH for the surgical resection. Seven patients did not have enough blood for CTC enumeration.

<sup>a</sup>15 patients at relapsed timepoint overlapped with CTC4-9.

**Supplementary Table S2: ROC analysis of CTC and survival**

| CTC timepoints            | PFS   |           |             |             | OS    |           |             |             |
|---------------------------|-------|-----------|-------------|-------------|-------|-----------|-------------|-------------|
|                           | AUROC | Threshold | Sensitivity | Specificity | AUROC | Threshold | Sensitivity | Specificity |
| <b>CTC1<sub>E+M</sub></b> | 0.734 | 1.5       | 0.688       | 0.833       | 0.734 | 1.5       | 0.688       | 0.833       |
| <b>CTC3<sub>E</sub></b>   | 0.69  | 1.5       | 0.308       | 1           | 0.57  | 2.5       | 0.2         | 0.913       |
| <b>CTC4<sub>E+M</sub></b> | 0.768 | 2.5       | 0.526       | 1           | 0.708 | 2.5       | 0.636       | 0.842       |
| <b>CTC5<sub>E+M</sub></b> | 0.8   | 2.5       | 0.438       | 1           | 0.876 | 2.5       | 0.778       | 1           |
| <b>CTC7<sub>E+M</sub></b> | 0.638 | 2.5       | 0.5         | 1           | NA    |           |             |             |

**Supplementary Table S3: Association of pre-III CTC2<sub>E</sub> with poor pre-surgery treatment response in subgroup of 9 patients with adjuvant treatment after surgery**

| End of CTRT Imaging Reassessment | Positive CTC2 <sub>E</sub> | Negative CTC2 <sub>E</sub> | Fisher Exact Test, 2-sided <i>p</i> |
|----------------------------------|----------------------------|----------------------------|-------------------------------------|
| <b>Good response</b>             | 1                          | 5                          | <b>0.048</b>                        |
| - 0 CR                           |                            |                            |                                     |
| - 6 PR                           |                            |                            |                                     |
| <b>Poor response</b>             | 3                          | 0                          |                                     |
| - 1 SD                           |                            |                            |                                     |
| - 2 PD                           |                            |                            |                                     |
|                                  | 4                          | 5                          |                                     |

**Supplementary Table S4: The range, median and positive detection rates of epithelial CTC<sub>E</sub> at CTC1 to CTC13**

| Statistics                                            | CTC1<br>Baseline <sub>E</sub> | CTC2 Pre-<br>III <sub>E</sub> | CTC3 Pre-<br>surgery <sub>E</sub> | CTC4 1M<br>post-<br>surgery <sub>E</sub> | CTC5 3M<br>post-<br>surgery <sub>E</sub> | CTC6 6M<br>post-<br>surgery <sub>E</sub> | CTC7 9M<br>post-<br>surgery <sub>E</sub> | CTC8 12M<br>post-<br>surgery <sub>E</sub> | CTC9 18M<br>post-<br>surgery <sub>E</sub> | CTC10 24M<br>post-<br>surgery <sub>E</sub> | CTC11<br>30M post-<br>surgery <sub>E</sub> | CTC12 36M<br>post-<br>surgery <sub>E</sub> | CTC13<br>Relapse <sub>E</sub> |
|-------------------------------------------------------|-------------------------------|-------------------------------|-----------------------------------|------------------------------------------|------------------------------------------|------------------------------------------|------------------------------------------|-------------------------------------------|-------------------------------------------|--------------------------------------------|--------------------------------------------|--------------------------------------------|-------------------------------|
| Number of values                                      | 61                            | 10                            | 45                                | 65                                       | 58                                       | 47                                       | 29                                       | 26                                        | 10                                        | 17                                         | 12                                         | 7                                          | 17                            |
| Minimum                                               | 0.0                           | 0.0                           | 0.0                               | 0.0                                      | 0.0                                      | 0.0                                      | 0.0                                      | 0.0                                       | 0.0                                       | 0.0                                        | 0.0                                        | 0.0                                        | 0.0                           |
| Median                                                | 0.0                           | 0.5                           | 0.0                               | 0.0                                      | 0.0                                      | 0.0                                      | 0.0                                      | 0.0                                       | 0.0                                       | 0.0                                        | 0.0                                        | 0.0                                        | 1.0                           |
| Maximum                                               | 5.0                           | 42.0                          | 9.0                               | 9.0                                      | 7.0                                      | 6.0                                      | 4.0                                      | 3.0                                       | 2.0                                       | 1.0                                        | 0.0                                        | 0.0                                        | 8.0                           |
| Mean                                                  | 0.8                           | 5.0                           | 1.0                               | 1.1                                      | 0.7                                      | 0.5                                      | 0.8                                      | 0.5                                       | 0.5                                       | 0.1                                        | 0.0                                        | 0.0                                        | 2.1                           |
| Std. Deviation                                        | 1.2                           | 13.1                          | 2.1                               | 1.9                                      | 1.3                                      | 1.1                                      | 1.2                                      | 0.8                                       | 0.7                                       | 0.2                                        | 0.0                                        | 0.0                                        | 2.6                           |
| number of samples<br>with detectable CTC <sub>E</sub> | 24                            | 5                             | 15                                | 28                                       | 18                                       | 13                                       | 13                                       | 10                                        | 4                                         | 1                                          | 0                                          | 0                                          | 9                             |
| Positive CTC <sub>E</sub><br>detection rate           | 39.3%                         | 50.0%                         | 33.3%                             | 43.1%                                    | 31.0%                                    | 27.7%                                    | 44.8%                                    | 38.5%                                     | 40.0%                                     | 5.9%                                       | 0.0%                                       | 0.0%                                       | 52.9%                         |

**Supplementary Table S5: The range, median and positive detection rates of total CTC<sub>E+M</sub> at CTC1 to CTC13**

| Statistics                                              | CTC1<br>Baseline <sub>E+M</sub> | CTC2<br>Pre-III <sub>E+M</sub> | CTC3 Pre-<br>op <sub>E+M</sub> | CTC4 1M<br>post-<br>surgery <sub>E+M</sub> | CTC5 3M<br>post-<br>surgery <sub>E+M</sub> | CTC6 6M<br>post-<br>surgery <sub>E+M</sub> | CTC7 9M<br>post-<br>surgery <sub>E+M</sub> | CTC8 12M<br>post-<br>surgery <sub>E+M</sub> | CTC9 18M<br>post-<br>surgery <sub>E+M</sub> | CTC10 24M<br>post-<br>surgery <sub>E+M</sub> | CTC11 30M<br>post-<br>surgery <sub>E+M</sub> | CTC12 36M<br>post-<br>surgery <sub>E+M</sub> | CTC13<br>Relapse <sub>E+M</sub> |
|---------------------------------------------------------|---------------------------------|--------------------------------|--------------------------------|--------------------------------------------|--------------------------------------------|--------------------------------------------|--------------------------------------------|---------------------------------------------|---------------------------------------------|----------------------------------------------|----------------------------------------------|----------------------------------------------|---------------------------------|
| Number of values                                        | 23                              | 7                              | 22                             | 32                                         | 27                                         | 21                                         | 13                                         | 13                                          | 9                                           | 17                                           | 12                                           | 7                                            | 11                              |
| Minimum                                                 | 0.0                             | 0.0                            | 0.0                            | 0.0                                        | 0.0                                        | 0.0                                        | 0.0                                        | 0.0                                         | 0.0                                         | 0.0                                          | 0.0                                          | 0.0                                          | 0.0                             |
| Median                                                  | 2.0                             | 2.0                            | 1.5                            | 0.0                                        | 1.0                                        | 0.0                                        | 1.0                                        | 1.0                                         | 1.0                                         | 0.0                                          | 0.0                                          | 0.0                                          | 3.0                             |
| Maximum                                                 | 23.0                            | 99.0                           | 284.0                          | 21.0                                       | 12.0                                       | 54.0                                       | 9.0                                        | 4.0                                         | 1.0                                         | 10.0                                         | 1.0                                          | 2.0                                          | 284.0                           |
| Mean                                                    | 3.5                             | 19.4                           | 15.2                           | 2.5                                        | 2.3                                        | 5.6                                        | 2.0                                        | 1.0                                         | 0.6                                         | 0.9                                          | 0.3                                          | 0.6                                          | 28.9                            |
| Std. Deviation                                          | 5.2                             | 36.2                           | 60.1                           | 4.5                                        | 3.0                                        | 15.2                                       | 2.6                                        | 1.2                                         | 0.5                                         | 2.4                                          | 0.5                                          | 1.0                                          | 84.6                            |
| number of samples with<br>detectable CTC <sub>E+M</sub> | 16                              | 6                              | 14                             | 15                                         | 19                                         | 9                                          | 8                                          | 7                                           | 5                                           | 5                                            | 3                                            | 2                                            | 9                               |
| Positive CTC <sub>E+M</sub><br>detection rate           | 69.6%                           | 85.7%                          | 63.6%                          | 46.9%                                      | 70.4%                                      | 42.9%                                      | 61.5%                                      | 53.8%                                       | 55.6%                                       | 29.4%                                        | 25.0%                                        | 28.6%                                        | 81.8%                           |



**Supplementary Table S6: Patients with recurrent CTC clusters**

| Patient ID | Timepoints with CTC clusters                  |
|------------|-----------------------------------------------|
| T112       | CTC2 (PB) and CTC3 (both PB and Azygos blood) |
| T113       | CTC1 (PB) and CTC3 (PB)                       |
| T125       | CTC1 (PB) and CTC3 (both PB and Azygos blood) |
| T193       | CTC2 (PB) and CTC3 (PB)                       |

**Supplementary Table S7: Univariate COX regression analysis of clinical pathological parameters and CTC counts at baseline, pre- and post-surgery with progression-free and overall survival.**

| Variables                                                                            | PFS HR (95% CI)               | <i>p</i> -Value              | OS HR (95% CI)              | <i>p</i> -Value              |
|--------------------------------------------------------------------------------------|-------------------------------|------------------------------|-----------------------------|------------------------------|
| Age                                                                                  | 1.010 (0.98 – 1.04)           | 0.539                        | 0.997 (0.96 – 1.03)         | 0.856                        |
| Gender (M vs F ref)                                                                  | <b>2.890 (1.22 – 6.87)</b>    | <b>0.016</b>                 | <b>5.005 (1.53 – 16.42)</b> | <b>0.008</b>                 |
| L cat (Others vs Lower ref)                                                          | 1.384 (0.72 – 2.65)           | 0.352                        | 1.408 (0.68 – 2.94)         | 0.361                        |
| G cat (G3 vs G1+G2 ref)                                                              | 1.231 (0.49 – 3.09)           | 0.657                        | 0.877 (0.29 – 2.61)         | 0.813                        |
| Stage at diagnosis (III + IV vs I+II ref)                                            | <b>2.66 (1.30 – 5.44)</b>     | <b>0.007</b>                 | 2.13 (0.99 – 4.60)          | 0.055                        |
| pT (3+4 vs 1+2 ref)                                                                  | <b>4.108 (1.86 – 9.09)</b>    | <b>4.9 x 10<sup>-4</sup></b> | <b>4.367 (1.76 – 10.86)</b> | <b>0.002</b>                 |
| pN (1-3 vs 0 ref)                                                                    | 1.711 (0.87 – 3.38)           | 0.122                        | 1.545 (0.72 – 3.31)         | 0.263                        |
| Distant metastasis (Yes vs No ref)                                                   | 1.945 (0.86 – 4.38)           | 0.108                        | 2.310 (0.95 – 5.59)         | 0.064                        |
| Baseline CTC1 level (n = 58)                                                         |                               | <b>0.002</b>                 |                             | <b>0.004</b>                 |
| High epithelial CTC level (≥3 CTC <sub>E</sub> vs 0-2 CTC <sub>E</sub> ref)          | <b>4.846 (1.80 – 13.08)</b>   | <b>0.002</b>                 | <b>4.389 (1.62 – 11.93)</b> | <b>0.004</b>                 |
| High total CTC level (≥3 CTC <sub>E+M</sub> vs 0-2 CTC <sub>E</sub> ref)             | <b>3.708 (1.08 – 12.69)</b>   | <b>0.037</b>                 | <b>4.059 (1.16 – 14.24)</b> | <b>0.029</b>                 |
| Pre-surgery CTC <sub>E</sub> count (All patients)                                    |                               |                              |                             |                              |
| (≥2 CTC <sub>E</sub> vs 0-1 CTC <sub>E</sub> ref) (n = 72)                           | <b>3.360 (1.72 – 6.57)</b>    | <b>3.9 x 10<sup>-4</sup></b> | 1.982 (0.91 – 4.31)         | 0.084                        |
| (≥3 CTC <sub>E</sub> vs 0-2 CTC <sub>E</sub> ref) (n = 72)                           | <b>9.600 (4.35 – 21.17)</b>   | <b>2.1 x 10<sup>-8</sup></b> | <b>4.956 (2.18 – 11.28)</b> | <b>1.4 x 10<sup>-4</sup></b> |
| CTC <sub>3E</sub> count at end of CTRT (Neo-adjuvant treatment)                      |                               |                              |                             |                              |
| (≥2 vs 0-1 CTCs ref) (n = 43)                                                        | <b>6.271 (2.60 – 15.11)</b>   | <b>4.3 x 10<sup>-5</sup></b> | 1.954 (0.71 – 5.40)         | 0.196                        |
| (≥3 vs 0-2 CTCs ref) (n = 43)                                                        | <b>43.183 (8.35 – 223.37)</b> | <b>7.0 x 10<sup>-6</sup></b> | <b>3.485 (1.15 – 10.55)</b> | <b>0.027</b>                 |
| CTC4 count at post-surgery 1M (n = 60)                                               |                               | <b>0.001</b>                 |                             | <b>0.020</b>                 |
| (≥3 CTC <sub>E</sub> vs 0-2 CTC <sub>E</sub> ref)                                    | <b>2.775 (1.15 – 6.70)</b>    | <b>0.023</b>                 | 2.099 (0.75 – 5.90)         | 0.159                        |
| (≥3 CTC <sub>E+M</sub> vs 0-2 CTC <sub>E</sub> ref)                                  | <b>8.602 (2.33 – 31.78)</b>   | <b>0.001</b>                 | <b>8.480 (1.67 – 42.96)</b> | <b>0.010</b>                 |
| CTC5 count at post-surgery 3M (n = 57)                                               |                               | <b>2.0 x 10<sup>-4</sup></b> |                             | <b>3.0 x 10<sup>-4</sup></b> |
| (≥3 CTC <sub>E</sub> vs 0-2 CTC <sub>E</sub> ref)                                    | <b>5.478 (1.55 – 19.41)</b>   | <b>0.008</b>                 | <b>7.227 (2.00 – 26.11)</b> | <b>0.003</b>                 |
| (≥3 CTC <sub>E+M</sub> vs 0-2 CTC <sub>E</sub> ref)                                  | <b>6.503 (2.42 – 17.46)</b>   | <b>2.0 x 10<sup>-4</sup></b> | <b>6.840 (2.24 – 20.88)</b> | <b>7.3 x 10<sup>-4</sup></b> |
| Change of pre-surgery and CTC4 (n=64)                                                |                               |                              |                             |                              |
| Others vs favorable status (0-2 CTC <sub>E</sub> ) at both pre-surgery and CTC4 ref) | <b>4.371 (2.21 – 8.65)</b>    | <b>2.3 x 10<sup>-5</sup></b> | <b>4.167 (1.94 – 8.96)</b>  | <b>2.6 x 10<sup>-4</sup></b> |
| Change of pre-surgery and CTC5 (n=56)                                                |                               |                              |                             |                              |
| Others vs favorable status (0-2 CTC <sub>E</sub> ) at both pre-surgery and CTC5 ref) | <b>9.366 (4.15 – 21.13)</b>   | <b>7.1 x 10<sup>-8</sup></b> | <b>8.136 (3.49 – 18.99)</b> | <b>1.3 x 10<sup>-6</sup></b> |
| Pre-surgery CTC clusters (Yes vs No ref) (n=85)                                      | <b>2.974 (1.17 – 7.59)</b>    | <b>0.023</b>                 | 2.263 (0.68 – 7.49)         | 0.181                        |

### **Univariate COX regression analysis**

Pearson chi square and Fisher's exact tests were used for comparison between CTC status and categorical clinicopathological factors. Student t test was used for comparison of CTC numbers. Among the clinical pathological parameters analysed by the univariate COX regression, gender, clinical tumor staging at diagnosis, and the pathological primary tumour (pT) staging after resection were significantly associated with PFS and OS ( $p<0.05$ ), while no significant association was observed between age, location of primary tumour (L cat), differentiation status (G cat), pathological regional lymph node (pN) staging after resection and distant metastasis and PFS and OS.

The presence of pre-surgery clusters, CTC level at baseline, pre-operation, and end of CRT for patients receiving neoadjuvant treatment, CTC4, CTC5, and change of pre-surgery and CTC5 CTC levels were associated with PFS and OS by univariate COX analysis ( $p<0.05$ ).
